# Supplementary material for: Awareness and Preventive Practices for Diphtheria Among Caregivers of Children Aged 2-14 Years Old in Osogbo Local Government Area, Osun State, South -Western Nigeria
Source: Research Square preprint supplement (doi:10.21203/rs.3.rs-8037395/v1), 2025-12-02
Supplement: Supplementary file 1 [file 653731354bcbc8ed1c0c07c4.docx]

### **INSTRUMENT OF DATA COLLECTION**

**UNIVERSITY OF IBADAN**

**COLLEGE OF MEDICINE, FACULTY OF PUBLIC HEALTH**

**DEPARTMENT OF EPIDEMIOLOGY AND PUBLIC HEALTH**

**Title of Study: AWARENESS AND PREVENTIVE PRACTIICES FOR DIPHTHERIA AMONG CAREGIVERS OF CHILDREN AGED 2-14 YEARS OLD IN OSOGBO LOCAL GOVERNMENT AREA, OSUN STATE, SOUTH -WESTERN NIGERIA**

Dear respondent,

I am HASSAN RASHIDAT OLABISI, a postgraduate student of the department of Epidemiology and Medical Statistics, University of Ibadan. This questionnaire has been designed to assess the awareness and preventive practices for diphtheria among caregivers of children aged 2-14 years old in Osogbo Local Government Area, Osogbo, Osun State. Please kindly fill the questionnaire with sincere responses as it will be used only for academic purposes and your responses will be treated with utmost confidentiality. Thank you.

Instructions: Please tick () the option that best represents your option.

Primary Health Care Center__________________________

**SECTION A: Socio- Demographic Information of the Respondents (Caregivers).**

1. Sex: (a) male () (b) female ()
2. Age las at last birthday (years):______
3. Ethnicity: (a) Yoruba ( ) (b) Hausa ( ) (c) Igbo ( ) (d) Others (specify)______
4. Religion: (a) Islam( ) (b) Christianity( ) (c) Traditional ( ) (d) Others (specify) _____
5. Occupation: (a) Unemployed Housewife ( ) (b) Petty/Small Trading ( ) (c) Big Trading/Business( ) (d) Artisan ( ) (e)Junior Civil Servant ( ) (f) Senior Civil Servant( ) (g) others(specify) ______
6. Level of education: (a) No formal education ( ) (b) Primary Education ( ) (c) Secondary Education ( ) (d) Tertiary Education ( )
7. Monthly income (Naira) : _________(specify)
8. Age of child (years): _______
9. Sex of child: (a) male () b) female ()
10. Relationship to child: (a) Father ( ) (b) mother( ) (c) Uncle( ) (d) Aunt( ) (e) grandparents ( ) (f) sister( ) (g) brother ( )

**Section B**

**Prevalence of risk factors for diphtheria among children aged 2-14 years.**

**Vaccination Status**

1. Did your child receive each of the following routine immunization?

| SN | Routine Immunization | Yes | No |
| --- | --- | --- | --- |
| 1 | Bacille Calmette Guerin (BCG) |  |  |
| 2 | Oral Polio Vaccine (OPV _0,1,2,3) |  |  |
| 3 | Injectable polio vaccine (IPV) |  |  |
| 4 | Hepatitis B vaccine |  |  |
| 5 | Pneumococcal Conjugate Vaccine (PCV_1,2,3) |  |  |
| 6 | Pentavalent vaccine (diphtheria, pertussis, tetanus, Hib, HepB)(1,2,3) |  |  |
| 7 | Rotavirus vaccine(1,2,3) |  |  |
| 8 | Measles vaccine |  |  |
| 9 | Yellow fever vaccine |  |  |
| 10 | Vitamin A |  |  |

1. What is the child's immunization status? [interviewer to state this from the table Q1]

(a ) complete ( ) (b) incomplete ( c) none

**Household characteristics**:

1. Which of this accommodation do you live in? (a) Face to face ( ) (b) a room and parlour ( ) (c) 1 bedroom apartment ( ) (d) 2 bedrooms apartment (e) 3 bedrooms apartment( ) (e) others (specify)___________
2. Total number of occupants in your house_________(specify)
3. How many children aged 2-14 live in your house?_______(specify)
4. How many people share a bed/ room with your child selected for this study (index child)?___________(specify)
5. Does your child share eating utensils with other members of the family ? (a) Yes ( ) (b) No ( )
6. Does your child share towels and other personal clothing with others? (a) Yes ( ) (b) No ( )

**Exposure Status:**

Case definition: Suspected cases are any persons with an illness of upper respiratory tract with adherent pseudo-membrane of the pharynx, tonsils, larynx or nose. Clinical features include fever, sore throat, bull neck, and grayish/whitish discoloration of the throat and tonsils.
(https://ncdc.gov.ng/themes/common/docs/protocols/358_1738765953.pdf)

1. Has your child traveled to the Northern part of Nigeria in the last 1 month? (a) Yes ( ) (b) No ( )
2. Has your child had contact with someone with symptoms suggestive of Diphtheria at home , school , mosque, church, or living area/neighbourhood? (a) Yes ( ) (b) No ( ) ( c) I don't know ( )
3. Has there been a case with the above symptoms diagnosed to be diphtheria in your area? (a) Yes ( ) (b) No ( ) ( c) I don't know ( )
4. Has your child had contact with a case of diphtheria ? (a) Yes ( ) (b) No ( ) ( c) I don't know ( )

**Section C**

**Awareness of diphtheria among Caregivers**

Case definition: Suspected cases are any persons with an illness of upper respiratory tract with adherent pseudo-membrane of the pharynx, tonsils, larynx or nose. Clinical features include fever, sore throat, bull neck, and grayish/whitish discoloration of the throat and tonsils.
(<https://ncdc.gov.ng/themes/common/docs/protocols/358_1738765953.pdf>)

1. Have you heard of diphtheria ? ( a case with the above symptoms) (a) ( ) Yes (b) No( )

**If No, please skip all other questions in this section.**

1. What was your source of information? (a) Family & friends ( ) (b) healthcare workers ( ) (c) social media( ) (d) mass media (television, radio, newspapers ) ( ) (e) Internet ( )
2. Diphtheria can be transmitted by: tick all that applies

(a) person to person( ). (b) coughing( )

(c) sneezing( ). (d) touching infected open sore( )

1. Symptoms of diphtheria include: tick all that applies

(a)Weakness ( ). (b) swollen neck ( )

(c) skin sore covered with grey tissue ( ). (d) sore throat( )

(e) difficulty breathing ( ). (f) difficulty swallowing ( )

(g) fever ( ) (h) thick white/grey coating in throat/nose( )

Please select true or false for the following statements

| SN | Statement | True | False | Don't know |
| --- | --- | --- | --- | --- |
| 28 | Diphtheria can be treated |  |  |  |
| 29 | Diphtheria can be prevented |  |  |  |
| 30 | Vaccination is necessary to prevent diphtheria |  |  |  |

**Section D**

**Adoption of Preventive Practices**

| SN | Preventive Practices | Always | Occasionally | Rarely | Never |
| --- | --- | --- | --- | --- | --- |
| 31 | Do you ensure your child gets vaccinated at the appropriate schedule? |  |  |  |  |
| 32 | In case of a missed vaccination schedule, do you take your child back to the clinic when available.? |  |  |  |  |
| 33 | Do you ensure your child stays indoor/avoid gatherings such as school when they get sick or have a cold ? |  |  |  |  |
| 34 | Do you encourage your child to cover their mouth and/or nose when coughing and/or sneezing with tissue? |  |  |  |  |
| 35 | Do you dispose used tissues in the bin after use? |  |  |  |  |
| 36 | Do you encourage your child to wash his/her hand with soap and water (or hand sanitizer) before and after eating.? |  |  |  |  |
| 37 | Do you encourage your child to wash his/her hand with soap and water (or hand sanitizer) after using the toilet.? |  |  |  |  |
| 38 | Do you encourage your child to wash his/her hand with soap and water (or hand sanitizer) after touching different surfaces or objects (door knobs, toys, among others)? |  |  |  |  |
| 39 | Do you ensure your child washes his or hands after coming back from outside ? |  |  |  |  |
| 40 | Do you sanitize your child(ren)'s toys /utensils ? |  |  |  |  |
| 41 | Do you clean and disinfect surfaces and objects in your home? |  |  |  |  |

We have come to the end of the interview.

Thank you.
